# Supplementary material for: Functional noncoding SNPs in human endothelial cells fine-map vascular trait associations
Source: HighWire-hosted journal article supplement (doi:10.1101/gr.276064.121), 2022-02-22
Supplement: Supplemental_Table_S1.xlsx [file Supplemental_Table_S1.xlsx]

## Sheet: Supplemental_Table_S1
Supplemental_Table_S1 – List of all GWAS traits that were considered vascular within our study
Abdominal_aortic_aneurysm
Acute_insulin_response
Allergic_rhinitis
Aortic_root_size
Apolipoprotein_A1_levels
Asthma
Asthma_adult_onset
Atopic_asthma
Birth_weight
Blood_protein_levels
Blood_urea_nitrogen_levels
BMI_adjusted_for_smoking_behaviour
BMI_in_non_smokers
BMI_in_smokers
Body_mass_index
Calcific_aortic_valve_stenosis
Carotid_intima_media_thickness
Carotid_intima_media_thickness_mean
Carotid_intima_media_thickness_mean_maximum
Central_corneal_thickness
Childhood_obesity
Chronic_inflammatory_diseases_ankylosing_spondylitis_Crohn's_disease_psoriasis_primary_sclerosing_cholangitis_ulcerative_colitis_pleiotropy
Chronic_obstructive_pulmonary_disease
Circulating_leptin_levels_or_type_2_diabetes
Coronary_artery_aneurysm_in_Kawasaki_disease
Coronary_artery_calcified_atherosclerotic_plaque_90_or_130_HU_threshold_in_type_2_diabetes
Coronary_artery_disease
Coronary_artery_disease_or_ischemic_stroke
Coronary_artery_disease_or_large_artery_stroke
Coronary_heart_disease
Crohn's_disease
Depression
Depression_broad
Diabetic_kidney_disease
Endometriosis
Eosinophil_counts
Estimated_glomerular_filtration_rate
Fasting_blood_glucose
Fasting_blood_glucose_BMI_interaction
Fasting_blood_proinsulin_levels
FEV1
Glaucoma
Glomerular_filtration_rate
Glomerular_filtration_rate_creatinine
Glycated_hemoglobin_levels
Granulocyte_count
Granulocyte_percentage_of_myeloid_white_cells
Hay_fever_and_or_eczema
HDL_cholesterol
HDL_cholesterol_levels
Hypertension
Inflammatory_bowel_disease
Intraocular_pressure
Kawasaki_disease
Large_artery_stroke
LDL_cholesterol
LDL_cholesterol_levels
Low_density_lipoprotein_cholesterol_levels
Lung_function
Lung_function_FEV1
Lung_function_FEV1_FVC
Lung_function_FVC
Lymphocyte_percentage_of_white_cells
Medication_use_agents_acting_on_the_renin_angiotensin_system
Medication_use_drugs_used_in_diabetes
Medication_use_HMG_CoA_reductase_inhibitors
Monocyte_percentage_of_white_cells
Myeloid_white_cell_count
Myocardial_infarction
Neurological_blood_protein_biomarker_levels
Neutrophil_count
Neutrophil_percentage_of_white_cells
Peak_expiratory_flow
Post_bronchodilator_FEV1
Post_bronchodilator_FEV1_FVC_ratio
Post_bronchodilator_FEV1_FVC_ratio_in_COPD
Proinsulin_levels
Pulse_pressure
Response_to_statin_therapy
Sum_basophil_neutrophil_counts
Sum_eosinophil_basophil_counts
Sum_neutrophil_eosinophil_counts
Systolic_blood_pressure
Systolic_blood_pressure_response_to_hydrochlorothiazide_in_hypertension
Triglyceride_levels
Type_2_diabetes
Ulcerative_colitis
Uterine_fibroids
Waist_circumference
Waist_circumference_adjusted_for_BMI_adjusted_for_smoking_behaviour
Waist_circumference_adjusted_for_BMI_in_active_individuals
Waist_circumference_adjusted_for_BMI_in_non_smokers
Waist_circumference_adjusted_for_BMI_in_smokers
Waist_circumference_adjusted_for_BMI_joint_analysis_main_effects_and_physical_activity_interaction
Waist_circumference_adjusted_for_BMI_joint_analysis_main_effects_and_smoking_interaction
Waist_circumference_adjusted_for_body_mass_index
Waist_hip_ratio
Waist_to_hip_ratio_adjusted_for_BMI
