# Supplementary material for: Functional noncoding SNPs in human endothelial cells fine-map vascular trait associations
Source: HighWire-hosted journal article supplement (doi:10.1101/gr.276064.121), 2022-02-22
Supplement: Supplemental_Table_S3.xlsx [file Supplemental_Table_S3.xlsx]

## Sheet: Supplemental Table S3
Supplemental_Table_S3 – List of PCR primers and guide RNAs used for CRISPR/Cas9 deletion of target enhancers
PCR primers for deletion check	notes	direction	sequence (5'->3')
SMAD3	PCR primer to check for CRISPR-guided deletion	fw	ACTGGAGTGAGCGCTTGTC
	PCR primer to check for CRISPR-guided deletion	rv	CAGTCAGGTCTGCCCGAATC
LDAH	PCR primer to check for CRISPR-guided deletion	fw	GGTCCTCATTTGCCCTTTGC
	PCR primer to check for CRISPR-guided deletion	rv	AGGATGAGGTTGCCCCTAGT
SMAD3	guide RNA		GCGACTCAGTGACATTCACG
	guide RNA		TGGAACCAGGCGATGATAAC
LDAH	guide RNA		GTGGGCAAGCCTAGCAAAAG
	guide RNA		TGGAGGACATGTGCAACTAC
